# Supplementary material for: Genetic Diversity and Population Structure of Vibrio parahaemolyticus Isolated From Clinical and Food Sources
Source: Front Microbiol. 2021 Jul 27;12:708795. doi: 10.3389/fmicb.2021.708795 (PMC8353399; doi:10.3389/fmicb.2021.708795)
Supplement: Supplementary file 4 [file Data_Sheet_4.ZIP]

Archive with 295 entries (294 files):
- original files of sequencing results4/
- original files of sequencing results4/Vp287__dnaE-F.ab1
- original files of sequencing results4/Vp287__dnaE-R.ab1
- original files of sequencing results4/Vp287__dtdS-F.ab1
- original files of sequencing results4/Vp287__dtdS-R.ab1
- original files of sequencing results4/Vp287__gyrB-F.ab1
- original files of sequencing results4/Vp287__gyrB-R.ab1
- original files of sequencing results4/Vp287__pntA-F.ab1
- original files of sequencing results4/Vp287__pntA-R.ab1
- original files of sequencing results4/Vp287__pyrC-F.ab1
- original files of sequencing results4/Vp287__pyrC-R.ab1
- original files of sequencing results4/Vp287__recA-F.ab1
- original files of sequencing results4/Vp287__recA-R.ab1
- original files of sequencing results4/Vp287__tnaA-F.ab1
- original files of sequencing results4/Vp287__tnaA-R.ab1
- original files of sequencing results4/Vp292__dnaE-F.ab1
- original files of sequencing results4/Vp292__dnaE-R.ab1
- original files of sequencing results4/Vp292__dtdS-F.ab1
- original files of sequencing results4/Vp292__dtdS-R.ab1
- original files of sequencing results4/Vp292__gyrB-F.ab1
- original files of sequencing results4/Vp292__gyrB-R.ab1
- original files of sequencing results4/Vp292__pntA-F.ab1
- original files of sequencing results4/Vp292__pntA-R.ab1
- original files of sequencing results4/Vp292__pyrC-F.ab1
- original files of sequencing results4/Vp292__pyrC-R.ab1
- original files of sequencing results4/Vp292__recA-F.ab1
- original files of sequencing results4/Vp292__recA-R.ab1
- original files of sequencing results4/Vp292__tnaA-F.ab1
- original files of sequencing results4/Vp292__tnaA-R.ab1
- original files of sequencing results4/Vp293__dnaE-F.ab1
- original files of sequencing results4/Vp293__dnaE-R.ab1
- original files of sequencing results4/Vp293__dtdS-F.ab1
- original files of sequencing results4/Vp293__dtdS-R.ab1
- original files of sequencing results4/Vp293__gyrB-F.ab1
- original files of sequencing results4/Vp293__gyrB-R.ab1
- original files of sequencing results4/Vp293__pntA-F .ab1
- original files of sequencing results4/Vp293__pntA-R.ab1
- original files of sequencing results4/Vp293__pyrC-F.ab1
- original files of sequencing results4/Vp293__pyrC-R.ab1
- original files of sequencing results4/Vp293__recA-F .ab1
- original files of sequencing results4/Vp293__recA-R.ab1
- original files of sequencing results4/Vp293__tnaA-F.ab1
- original files of sequencing results4/Vp293__tnaA-R.ab1
- original files of sequencing results4/Vp297__dnaE-F.ab1
- original files of sequencing results4/Vp297__dnaE-R.ab1
- original files of sequencing results4/Vp297__dtdS-F.ab1
- original files of sequencing results4/Vp297__dtdS-R.ab1
- original files of sequencing results4/Vp297__gyrB-F.ab1
- original files of sequencing results4/Vp297__gyrB-R.ab1
- original files of sequencing results4/Vp297__pntA-F.ab1
- original files of sequencing results4/Vp297__pntA-R.ab1
- original files of sequencing results4/Vp297__pyrC-F.ab1
- original files of sequencing results4/Vp297__pyrC-R.ab1
- original files of sequencing results4/Vp297__recA-F.ab1
- original files of sequencing results4/Vp297__recA-R.ab1
- original files of sequencing results4/Vp297__tnaA-F.ab1
- original files of sequencing results4/Vp297__tnaA-R.ab1
- original files of sequencing results4/Vp299__dnaE-F.ab1
- original files of sequencing results4/Vp299__dnaE-R.ab1
- original files of sequencing results4/Vp299__dtdS-F.ab1
- original files of sequencing results4/Vp299__dtdS-R.ab1
- original files of sequencing results4/Vp299__gyrB-F.ab1
- original files of sequencing results4/Vp299__gyrB-R.ab1
- original files of sequencing results4/Vp299__pntA-F.ab1
- original files of sequencing results4/Vp299__pntA-R.ab1
- original files of sequencing results4/Vp299__pyrC-F.ab1
- original files of sequencing results4/Vp299__pyrC-R.ab1
- original files of sequencing results4/Vp299__recA-F.ab1
- original files of sequencing results4/Vp299__recA-R.ab1
- original files of sequencing results4/Vp299__tnaA-F.ab1
- original files of sequencing results4/Vp299__tnaA-R.ab1
- original files of sequencing results4/Vp301__dnaE-F.ab1
- original files of sequencing results4/Vp301__dnaE-R.ab1
- original files of sequencing results4/Vp301__dtdS-F.ab1
- original files of sequencing results4/Vp301__dtdS-R.ab1
- original files of sequencing results4/Vp301__gyrB-F.ab1
- original files of sequencing results4/Vp301__gyrB-R.ab1
- original files of sequencing results4/Vp301__pntA-F.ab1
- original files of sequencing results4/Vp301__pntA-R.ab1
- original files of sequencing results4/Vp301__pyrC-F.ab1
- original files of sequencing results4/Vp301__pyrC-R.ab1
- original files of sequencing results4/Vp301__recA-F.ab1
- original files of sequencing results4/Vp301__recA-R.ab1
- original files of sequencing results4/Vp301__tnaA-F.ab1
- original files of sequencing results4/Vp301__tnaA-R.ab1
- original files of sequencing results4/Vp305__dnaE-F.ab1
- original files of sequencing results4/Vp305__dnaE-R.ab1
- original files of sequencing results4/Vp305__dtdS-F.ab1
- original files of sequencing results4/Vp305__dtdS-R.ab1
- original files of sequencing results4/Vp305__gyrB-F.ab1
- original files of sequencing results4/Vp305__gyrB-R.ab1
- original files of sequencing results4/Vp305__pntA-F_.ab1
- original files of sequencing results4/Vp305__pntA-R.ab1
- original files of sequencing results4/Vp305__pyrC-F.ab1
- original files of sequencing results4/Vp305__pyrC-R.ab1
- original files of sequencing results4/Vp305__recA-F.ab1
- original files of sequencing results4/Vp305__recA-R.ab1
- original files of sequencing results4/Vp305__tnaA-F.ab1
- original files of sequencing results4/Vp305__tnaA-R.ab1
- original files of sequencing results4/Vp306__dnaE-F.ab1
- original files of sequencing results4/Vp306__dnaE-R.ab1
- original files of sequencing results4/Vp306__dtdS-F.ab1
- original files of sequencing results4/Vp306__dtdS-R.ab1
- original files of sequencing results4/Vp306__gyrB-F.ab1
- original files of sequencing results4/Vp306__gyrB-R.ab1
- original files of sequencing results4/Vp306__pntA-F.ab1
- original files of sequencing results4/Vp306__pntA-R.ab1
- original files of sequencing results4/Vp306__pyrC-F.ab1
- original files of sequencing results4/Vp306__pyrC-R.ab1
- original files of sequencing results4/Vp306__recA-F.ab1
- original files of sequencing results4/Vp306__recA-R.ab1
- original files of sequencing results4/Vp306__tnaA-F.ab1
- original files of sequencing results4/Vp306__tnaA-R.ab1
- original files of sequencing results4/Vp409__dnaE-F.ab1
- original files of sequencing results4/Vp409__dnaE-R.ab1
- original files of sequencing results4/Vp409__dtdS-F.ab1
- original files of sequencing results4/Vp409__dtdS-R.ab1
- original files of sequencing results4/Vp409__gyrB-F.ab1
- original files of sequencing results4/Vp409__gyrB-R.ab1
- original files of sequencing results4/Vp409__pntA-F.ab1
- original files of sequencing results4/Vp409__pntA-R.ab1
- original files of sequencing results4/Vp409__pyrC-F.ab1
- original files of sequencing results4/Vp409__pyrC-R.ab1
- original files of sequencing results4/Vp409__recA-F.ab1
- original files of sequencing results4/Vp409__recA-R.ab1
- original files of sequencing results4/Vp409__tnaA-F.ab1
- original files of sequencing results4/Vp409__tnaA-R.ab1
- original files of sequencing results4/Vp410__dnaE-F.ab1
- original files of sequencing results4/Vp410__dnaE-R.ab1
- original files of sequencing results4/Vp410__dtdS-F.ab1
- original files of sequencing results4/Vp410__dtdS-R.ab1
- original files of sequencing results4/Vp410__gyrB-F.ab1
- original files of sequencing results4/Vp410__gyrB-R.ab1
- original files of sequencing results4/Vp410__pntA-F.ab1
- original files of sequencing results4/Vp410__pntA-R.ab1
- original files of sequencing results4/Vp410__pyrC-F.ab1
- original files of sequencing results4/Vp410__pyrC-R.ab1
- original files of sequencing results4/Vp410__recA-F.ab1
- original files of sequencing results4/Vp410__recA-R.ab1
- original files of sequencing results4/Vp410__tnaA-F.ab1
- original files of sequencing results4/Vp410__tnaA-R.ab1
- original files of sequencing results4/Vp412__dnaE-F.ab1
- original files of sequencing results4/Vp412__dnaE-R.ab1
- original files of sequencing results4/Vp412__dtdS-F.ab1
- original files of sequencing results4/Vp412__dtdS-R.ab1
- original files of sequencing results4/Vp412__gyrB-F.ab1
- original files of sequencing results4/Vp412__gyrB-R.ab1
- original files of sequencing results4/Vp412__pntA-F.ab1
- original files of sequencing results4/Vp412__pntA-R.ab1
- original files of sequencing results4/Vp412__pyrC-F.ab1
- original files of sequencing results4/Vp412__pyrC-R.ab1
- original files of sequencing results4/Vp412__recA-F.ab1
- original files of sequencing results4/Vp412__recA-R.ab1
- original files of sequencing results4/Vp412__tnaA-F.ab1
- original files of sequencing results4/Vp412__tnaA-R.ab1
- original files of sequencing results4/Vp413__dnaE-F.ab1
- original files of sequencing results4/Vp413__dnaE-R.ab1
- original files of sequencing results4/Vp413__dtdS-F.ab1
- original files of sequencing results4/Vp413__dtdS-R.ab1
- original files of sequencing results4/Vp413__gyrB-F.ab1
- original files of sequencing results4/Vp413__gyrB-R.ab1
- original files of sequencing results4/Vp413__pntA-F.ab1
- original files of sequencing results4/Vp413__pntA-R.ab1
- original files of sequencing results4/Vp413__pyrC-F.ab1
- original files of sequencing results4/Vp413__pyrC-R.ab1
- original files of sequencing results4/Vp413__recA-F.ab1
- original files of sequencing results4/Vp413__recA-R.ab1
- original files of sequencing results4/Vp413__tnaA-F.ab1
- original files of sequencing results4/Vp413__tnaA-R.ab1
- original files of sequencing results4/Vp416__dnaE-F.ab1
- original files of sequencing results4/Vp416__dnaE-R.ab1
- original files of sequencing results4/Vp416__dtdS-F.ab1
- original files of sequencing results4/Vp416__dtdS-R.ab1
- original files of sequencing results4/Vp416__gyrB-F.ab1
- original files of sequencing results4/Vp416__gyrB-R.ab1
- original files of sequencing results4/Vp416__pntA-F.ab1
- original files of sequencing results4/Vp416__pntA-R.ab1
- original files of sequencing results4/Vp416__pyrC-F.ab1
- original files of sequencing results4/Vp416__pyrC-R.ab1
- original files of sequencing results4/Vp416__recA-F.ab1
- original files of sequencing results4/Vp416__recA-R.ab1
- original files of sequencing results4/Vp416__tnaA-F.ab1
- original files of sequencing results4/Vp416__tnaA-R.ab1
- original files of sequencing results4/Vp418__dnaE-F.ab1
- original files of sequencing results4/Vp418__dnaE-R.ab1
- original files of sequencing results4/Vp418__dtdS-F.ab1
- original files of sequencing results4/Vp418__dtdS-R.ab1
- original files of sequencing results4/Vp418__gyrB-F.ab1
- original files of sequencing results4/Vp418__gyrB-R.ab1
- original files of sequencing results4/Vp418__pntA-F.ab1
- original files of sequencing results4/Vp418__pntA-R.ab1
- original files of sequencing results4/Vp418__pyrC-F.ab1
- original files of sequencing results4/Vp418__pyrC-R.ab1
- original files of sequencing results4/Vp418__recA-F.ab1
- original files of sequencing results4/Vp418__recA-R.ab1
- original files of sequencing results4/Vp418__tnaA-F.ab1
- original files of sequencing results4/Vp418__tnaA-R.ab1
- original files of sequencing results4/Vp419__dnaE-F.ab1
- original files of sequencing results4/Vp419__dnaE-R.ab1
- original files of sequencing results4/Vp419__dtdS-F.ab1
- original files of sequencing results4/Vp419__dtdS-R.ab1
- original files of sequencing results4/Vp419__gyrB-F.ab1
- original files of sequencing results4/Vp419__gyrB-R.ab1
- original files of sequencing results4/Vp419__pntA-F.ab1
- original files of sequencing results4/Vp419__pntA-R.ab1
- original files of sequencing results4/Vp419__pyrC-F.ab1
- original files of sequencing results4/Vp419__pyrC-R.ab1
- original files of sequencing results4/Vp419__recA-F.ab1
- original files of sequencing results4/Vp419__recA-R.ab1
- original files of sequencing results4/Vp419__tnaA-F.ab1
- original files of sequencing results4/Vp419__tnaA-R.ab1
- original files of sequencing results4/Vp420__dnaE-F.ab1
- original files of sequencing results4/Vp420__dnaE-R.ab1
- original files of sequencing results4/Vp420__dtdS-F.ab1
- original files of sequencing results4/Vp420__dtdS-R.ab1
- original files of sequencing results4/Vp420__gyrB-F.ab1
- original files of sequencing results4/Vp420__gyrB-R.ab1
- original files of sequencing results4/Vp420__pntA-F.ab1
- original files of sequencing results4/Vp420__pntA-R.ab1
- original files of sequencing results4/Vp420__pyrC-F.ab1
- original files of sequencing results4/Vp420__pyrC-R.ab1
- original files of sequencing results4/Vp420__recA-F.ab1
- original files of sequencing results4/Vp420__recA-R.ab1
- original files of sequencing results4/Vp420__tnaA-F.ab1
- original files of sequencing results4/Vp420__tnaA-R.ab1
- original files of sequencing results4/Vp421__dnaE-F.ab1
- original files of sequencing results4/Vp421__dnaE-R.ab1
- original files of sequencing results4/Vp421__dtdS-F.ab1
- original files of sequencing results4/Vp421__dtdS-R.ab1
- original files of sequencing results4/Vp421__gyrB-F.ab1
- original files of sequencing results4/Vp421__gyrB-R.ab1
- original files of sequencing results4/Vp421__pntA-F.ab1
- original files of sequencing results4/Vp421__pntA-R.ab1
- original files of sequencing results4/Vp421__pyrC-F.ab1
- original files of sequencing results4/Vp421__pyrC-R.ab1
- original files of sequencing results4/Vp421__recA-F.ab1
- original files of sequencing results4/Vp421__recA-R.ab1
- original files of sequencing results4/Vp421__tnaA-F.ab1
- original files of sequencing results4/Vp421__tnaA-R.ab1
- original files of sequencing results4/Vp422__dnaE-F.ab1
- original files of sequencing results4/Vp422__dnaE-R.ab1
- original files of sequencing results4/Vp422__dtdS-F.ab1
- original files of sequencing results4/Vp422__dtdS-R.ab1
- original files of sequencing results4/Vp422__gyrB-F.ab1
- original files of sequencing results4/Vp422__gyrB-R.ab1
- original files of sequencing results4/Vp422__pntA-F.ab1
- original files of sequencing results4/Vp422__pntA-R.ab1
- original files of sequencing results4/Vp422__pyrC-F.ab1
- original files of sequencing results4/Vp422__pyrC-R.ab1
- original files of sequencing results4/Vp422__recA-F.ab1
- original files of sequencing results4/Vp422__recA-R.ab1
- original files of sequencing results4/Vp422__tnaA-F.ab1
- original files of sequencing results4/Vp422__tnaA-R.ab1
- original files of sequencing results4/Vp423__dnaE-F.ab1
- original files of sequencing results4/Vp423__dnaE-R.ab1
- original files of sequencing results4/Vp423__dtdS-F.ab1
- original files of sequencing results4/Vp423__dtdS-R.ab1
- original files of sequencing results4/Vp423__gyrB-F.ab1
- original files of sequencing results4/Vp423__gyrB-R.ab1
- original files of sequencing results4/Vp423__pntA-F.ab1
- original files of sequencing results4/Vp423__pntA-R.ab1
- original files of sequencing results4/Vp423__pyrC-F.ab1
- original files of sequencing results4/Vp423__pyrC-R.ab1
- original files of sequencing results4/Vp423__recA-F.ab1
- original files of sequencing results4/Vp423__recA-R.ab1
- original files of sequencing results4/Vp423__tnaA-F.ab1
- original files of sequencing results4/Vp423__tnaA-R.ab1
- original files of sequencing results4/Vp424__dnaE-F.ab1
- original files of sequencing results4/Vp424__dnaE-R.ab1
- original files of sequencing results4/Vp424__dtdS-F.ab1
- original files of sequencing results4/Vp424__dtdS-R.ab1
- original files of sequencing results4/Vp424__gyrB-F.ab1
- original files of sequencing results4/Vp424__gyrB-R.ab1
- original files of sequencing results4/Vp424__pntA-F.ab1
- original files of sequencing results4/Vp424__pntA-R.ab1
- original files of sequencing results4/Vp424__pyrC-F.ab1
- original files of sequencing results4/Vp424__pyrC-R.ab1
- original files of sequencing results4/Vp424__recA-F.ab1
- original files of sequencing results4/Vp424__recA-R.ab1
- original files of sequencing results4/Vp424__tnaA-F.ab1
- original files of sequencing results4/Vp424__tnaA-R.ab1
- original files of sequencing results4/Vp425__dnaE-F.ab1
- original files of sequencing results4/Vp425__dnaE-R.ab1
- original files of sequencing results4/Vp425__dtdS-F.ab1
- original files of sequencing results4/Vp425__dtdS-R.ab1
- original files of sequencing results4/Vp425__gyrB-F.ab1
- original files of sequencing results4/Vp425__gyrB-R.ab1
- original files of sequencing results4/Vp425__pntA-F.ab1
- original files of sequencing results4/Vp425__pntA-R.ab1
- original files of sequencing results4/Vp425__pyrC-F.ab1
- original files of sequencing results4/Vp425__pyrC-R.ab1
- original files of sequencing results4/Vp425__recA-F.ab1
- original files of sequencing results4/Vp425__recA-R.ab1
- original files of sequencing results4/Vp425__tnaA-F.ab1
- original files of sequencing results4/Vp425__tnaA-R.ab1
